# Supplementary material for: Spatially Resolved Panoramic in vivo CRISPR Screen via Perturb-DBiT
Source: Research Square preprint supplement (doi:10.21203/rs.3.rs-6481967/v1), 2025-05-08
Supplement: Supplementary file 2 [file Table_S1.xlsx]

## Sheet: Table_S1
Sample	Unique gRNAs detected	Unique total UMIs gRNA Detected	Total Library Size	Percent of Pixels with Guide Detected
NTC.SP.1	2	2809	2 (NTC)	10
Ep.Tu.1	78	10876	86 (Epigenetic)	89
mTSG.LV.1	265	6418	280 (mTSG)	74
Bru.LC.1	219	4120	77,441 (Brunello)	58
Bru.LC.2	195	4801	77,441 (Brunello)	62
Bru.LC.3	176	2204	77,441 (Brunello)	43
Bru.LC.6	235	5740	77,441 (Brunello)	52
mTSG.LV.2	136	754	280 (mTSG)	68
mTSG.LV.3	134	4801	280 (mTSG)	56
Bru.LC.7	250	5696	77,441 (Brunello)	80
Bru.LC.8	181	1164	77,441 (Brunello)	11
Brie.LU.1	91	17548	78,637 (Brie)	65
