# Supplementary material for: Spatially Resolved Panoramic in vivo CRISPR Screen via Perturb-DBiT
Source: Research Square preprint supplement (doi:10.21203/rs.3.rs-6481967/v1), 2025-05-08
Supplement: Supplementary file 7 [file Table_S2.xlsx]

## Sheet: Antibody List
Antibody	Source	Antibody Barcode	Reporter Barcode	Catlog #	Working Dilution
Anti-Mu Cd8a(AKYP0044)	Akoya Biosciences	BX029	RX029-Atto 550	425017	0.180556
Anti-Mu Cd5(AKYP0016)	Akoya Biosciences	BX016	RX016-Atto 550	4250007	0.180556
Anti-Mu MHC II(AKYP0006)	Akoya Biosciences	BX014	RX014-Atto 550	4250003	0.180556
Anti-Mu Cd4(AKYP0041)	Akoya Biosciences	BX026	RX026-Atto 550	4250016	0.180556
Anti-Mu Cd31(AKYP0002)	Akoya Biosciences	BX002	RX002-Atto 550	4250001	0.180556
Anti-Mu Cd21/35(AKYP0037)	Akoya Biosciences	BX023	RX023-Atto 550	4250015	0.180556
Anti-Mu Cd19(AKYP0033)	Akoya Biosciences	BX020	RX020-Atto 550	4250014	0.180556
Anti-Hu/Mu Ki67(B56)	Akoya Biosciences	BX047	RX047-Atto 550	4250019	0.180556
Anti-Mu GFP (Thermo-Fischer)	Thermo-Fisher	BX032	RX032-Atto550	MA5-15256	0.180556
Anti-Hu/Mu Cd44(AKYP0003)	Akoya Biosciences	BX005	RX005-Atto 550	4250002	0.180556
Anti-MuFoxp3 (Leinco)	Leinco	BX024	RX024-AF647	F400-25	0.180556
Anti-Mu Cd169(AKYP0015)	Akoya Biosciences	BX015	RX015-AF647	4550100	0.180556
Anti-Mu TCRb(AKYP0011)	Akoya Biosciences	BX003	RX003-AF647	4550101	0.180556
Anti-Mu Cd3(AKYP0035)	Akoya Biosciences	BX021	RX021-AF647	4550109	0.180556
Anti-Mu Cd11c(AKYP0045)	Akoya Biosciences	BX030	RX030-AF647	4550108	0.180556
Anti-Mu F4/80 (Cy5) (Leinco)	Leinco	BX006	RX006-AF647	F401-25	0.180556
Anti-Mu PD-1 (Leinco)	Leinco	BX027	RX027-AF647	P4150-25	0.180556
Anti-Hu/Mu Cd49f (AKYP0018)	Akoya Biosciences	BX033	RX033-AF647	4550102	0.180556
Anti-Mu PD-L1 (Leinco)	Leinco	BX028	RX028-AF647	P400-25	0.180556
Anti-Mu Cd11b(AKYP0040)	Akoya Biosciences	BX025	RX025-AF750	4450015	0.180556
Anti-Mu Cd90.2(AKYP0001)	Akoya Biosciences	BX001	RX001-AF750	4450001	0.180556
Anti-Mu Ter119(AKYP0013)	Akoya Biosciences	BX004	RX004-AF750	4450005	0.180556
Anti-Mu Cd24(AKYP0036)	Akoya Biosciences	BX022	RX022-AF750	4450014	0.180556
Anti-Mu Cd38(AKYP0032)	Akoya Biosciences	BX019	RX019-AF750	4450013	0.180556
Anti-Mu IgM(AKYP0025)	Akoya Biosciences	BX013	RX013-AF750	4450011	0.180556
Anti-Mu IgD(AKYP0030)	Akoya Biosciences	BX016	RX016-AF750	4450012	0.180556
Anti-Mu Cd45R/B220(AKYP0014)	Akoya Biosciences	BX010	RX010-AF750	4450006	0.180556
Anti-Mu Cd45(AKYP0005)	Akoya Biosciences	BX007	RX007-AF750	4450002	0.180556

## Sheet: Cycle Design
Cycle #	Antibody	Antibody volume (ml)
Cycle1	Blank cycle	Blank cycle
Cycle2	Cd8a	1
	Foxp3	1
	Cd11b	1
Cycle3	Cd5	1
	Cd169	1
	Cd90.2	1
Cycle4	MHCII	1
	Tcrb	1
	Ter119	1
Cycle5	Cd4	1
	Cd34	1
	Cd24	1
Cycle6	Cd31	1
	Cd11c	1
	Cd38	1
Cycle7	Cd21/35	1
	F4/80	1
	IgM	1
Cycle8	Cd19	1
	PD-1	1
	IgD	1
Cycle9	Cd44	1
	PD-L1	1
	Cd45	1
Cycle10	GFP	1
	NA	1
	NA	1
Cycle 11	Blank cycle	Blank cycle

## Sheet: Volume of Reporter Plate
Reagent (in uL)	Number of Cycles
	1	5	10	15
1x Phenocycler Buffer and Buffer Additive	270	1350	2700	4050
Assay Reagent	25	125	250	375
Nuclear Stain	5	10	20	30
Total Volume	300	1500	3000	4500
