# Supplementary material for: Spatially Resolved Panoramic in vivo CRISPR Screen via Perturb-DBiT
Source: Research Square preprint supplement (doi:10.21203/rs.3.rs-6481967/v1), 2025-05-08
Supplement: Supplementary file 12 [file Table_S3.xlsx]

## Sheet: Primers
Primer Name	Sequence
Ligation linker 1	AGTCGTACGCCGATGCGAAACATCGGCCAC
Ligation linker 2	CGAATGCTCTGGCCTCTCAAGCACGTGGAT
Transcriptome RT Primer	/5Phos/CATCGGCGTACGACTNNNNNNNNNN/iBiodT/TTTTTTTTTTTTTTTVN
Sp.DC RT Primer (CRISPR Primer)	/5Phos/GTCTCGTGGGCTCGGNNNNNNNNNN/iBiodT/TTGCTAGGACCGGCCTTAAAGC
Lu.Liv.DC RT Primer (CRISPR Primer)	/5Phos/GTCTCGTGGGCTCGGNNNNNNNNNN/iBiodT/GCACCGACTCGGTGCCAC
TSO Primer	AAGCAGTGGTATCAACGCAGAGTGAATrGrG+G
PCR Primer 1	CAAGCGTTGGCTTCTCGCATCT
PCR Primer 2	AAGCAGTGGTATCAACGCAGAGT
PCR Primer 3	GTCAGATGTGTATAAGAGACAG
N501	AATGATACGGCGACCACCGAGATCTACACTAGATCGCTCGTCGGCAGCGTCAGATGTGTATAAGAGACAG
N701	CAAGCAGAAGACGGCATACGAGATTCGCCTTAGTCTCGTGGGCTCGGAGATGTGTATAAGAGACAGCAAGCGTTGGCTTCTCGCATCT
N501 CRISPR_direct	AATGATACGGCGACCACCGAGATCTACACTAGATCGCTCGTCGGCAGCGTCAGATGTGTATAAGAGACAGAAGCAGTGGTATCAACGCAGAGT
N701 CRISPR	CAAGCAGAAGACGGCATACGAGATTCGCCTTAGTCTCGTGGGCTCGGAGATGTGTATAAGAGACAGGTCAGATGTGTATAAGAGACAG

## Sheet: Barocode A Set
Barcode ID	Sequence
Barcode A-1	/5Phos/AGGCCAGAGCATTCGAACGTGATGTGGCCGATGTTTCG
Barcode A-2	/5Phos/AGGCCAGAGCATTCGAAACATCGGTGGCCGATGTTTCG
Barcode A-3	/5Phos/AGGCCAGAGCATTCGATGCCTAAGTGGCCGATGTTTCG
Barcode A-4	/5Phos/AGGCCAGAGCATTCGAGTGGTCAGTGGCCGATGTTTCG
Barcode A-5	/5Phos/AGGCCAGAGCATTCGACCACTGTGTGGCCGATGTTTCG
Barcode A-6	/5Phos/AGGCCAGAGCATTCGACATTGGCGTGGCCGATGTTTCG
Barcode A-7	/5Phos/AGGCCAGAGCATTCGCAGATCTGGTGGCCGATGTTTCG
Barcode A-8	/5Phos/AGGCCAGAGCATTCGCATCAAGTGTGGCCGATGTTTCG
Barcode A-9	/5Phos/AGGCCAGAGCATTCGCGCTGATCGTGGCCGATGTTTCG
Barcode A-10	/5Phos/AGGCCAGAGCATTCGACAAGCTAGTGGCCGATGTTTCG
Barcode A-11	/5Phos/AGGCCAGAGCATTCGCTGTAGCCGTGGCCGATGTTTCG
Barcode A-12	/5Phos/AGGCCAGAGCATTCGAGTACAAGGTGGCCGATGTTTCG
Barcode A-13	/5Phos/AGGCCAGAGCATTCGAACAACCAGTGGCCGATGTTTCG
Barcode A-14	/5Phos/AGGCCAGAGCATTCGAACCGAGAGTGGCCGATGTTTCG
Barcode A-15	/5Phos/AGGCCAGAGCATTCGAACGCTTAGTGGCCGATGTTTCG
Barcode A-16	/5Phos/AGGCCAGAGCATTCGAAGACGGAGTGGCCGATGTTTCG
Barcode A-17	/5Phos/AGGCCAGAGCATTCGAAGGTACAGTGGCCGATGTTTCG
Barcode A-18	/5Phos/AGGCCAGAGCATTCGACACAGAAGTGGCCGATGTTTCG
Barcode A-19	/5Phos/AGGCCAGAGCATTCGACAGCAGAGTGGCCGATGTTTCG
Barcode A-20	/5Phos/AGGCCAGAGCATTCGACCTCCAAGTGGCCGATGTTTCG
Barcode A-21	/5Phos/AGGCCAGAGCATTCGACGCTCGAGTGGCCGATGTTTCG
Barcode A-22	/5Phos/AGGCCAGAGCATTCGACGTATCAGTGGCCGATGTTTCG
Barcode A-23	/5Phos/AGGCCAGAGCATTCGACTATGCAGTGGCCGATGTTTCG
Barcode A-24	/5Phos/AGGCCAGAGCATTCGAGAGTCAAGTGGCCGATGTTTCG
Barcode A-25	/5Phos/AGGCCAGAGCATTCGAGATCGCAGTGGCCGATGTTTCG
Barcode A-26	/5Phos/AGGCCAGAGCATTCGAGCAGGAAGTGGCCGATGTTTCG
Barcode A-27	/5Phos/AGGCCAGAGCATTCGAGTCACTAGTGGCCGATGTTTCG
Barcode A-28	/5Phos/AGGCCAGAGCATTCGATCCTGTAGTGGCCGATGTTTCG
Barcode A-29	/5Phos/AGGCCAGAGCATTCGATTGAGGAGTGGCCGATGTTTCG
Barcode A-30	/5Phos/AGGCCAGAGCATTCGCAACCACAGTGGCCGATGTTTCG
Barcode A-31	/5Phos/AGGCCAGAGCATTCGGACTAGTAGTGGCCGATGTTTCG
Barcode A-32	/5Phos/AGGCCAGAGCATTCGCAATGGAAGTGGCCGATGTTTCG
Barcode A-33	/5Phos/AGGCCAGAGCATTCGCACTTCGAGTGGCCGATGTTTCG
Barcode A-34	/5Phos/AGGCCAGAGCATTCGCAGCGTTAGTGGCCGATGTTTCG
Barcode A-35	/5Phos/AGGCCAGAGCATTCGCATACCAAGTGGCCGATGTTTCG
Barcode A-36	/5Phos/AGGCCAGAGCATTCGCCAGTTCAGTGGCCGATGTTTCG
Barcode A-37	/5Phos/AGGCCAGAGCATTCGCCGAAGTAGTGGCCGATGTTTCG
Barcode A-38	/5Phos/AGGCCAGAGCATTCGCCGTGAGAGTGGCCGATGTTTCG
Barcode A-39	/5Phos/AGGCCAGAGCATTCGCCTCCTGAGTGGCCGATGTTTCG
Barcode A-40	/5Phos/AGGCCAGAGCATTCGCGAACTTAGTGGCCGATGTTTCG
Barcode A-41	/5Phos/AGGCCAGAGCATTCGCGACTGGAGTGGCCGATGTTTCG
Barcode A-42	/5Phos/AGGCCAGAGCATTCGCGCATACAGTGGCCGATGTTTCG
Barcode A-43	/5Phos/AGGCCAGAGCATTCGCTCAATGAGTGGCCGATGTTTCG
Barcode A-44	/5Phos/AGGCCAGAGCATTCGCTGAGCCAGTGGCCGATGTTTCG
Barcode A-45	/5Phos/AGGCCAGAGCATTCGCTGGCATAGTGGCCGATGTTTCG
Barcode A-46	/5Phos/AGGCCAGAGCATTCGGAATCTGAGTGGCCGATGTTTCG
Barcode A-47	/5Phos/AGGCCAGAGCATTCGCAAGACTAGTGGCCGATGTTTCG
Barcode A-48	/5Phos/AGGCCAGAGCATTCGGAGCTGAAGTGGCCGATGTTTCG
Barcode A-49	/5Phos/AGGCCAGAGCATTCGGATAGACAGTGGCCGATGTTTCG
Barcode A-50	/5Phos/AGGCCAGAGCATTCGGCCACATAGTGGCCGATGTTTCG
Barcode A-51	/5Phos/AGGCCAGAGCATTCGGCGAGTAAGTGGCCGATGTTTCG
Barcode A-52	/5Phos/AGGCCAGAGCATTCGGCTAACGAGTGGCCGATGTTTCG
Barcode A-53	/5Phos/AGGCCAGAGCATTCGGCTCGGTAGTGGCCGATGTTTCG
Barcode A-54	/5Phos/AGGCCAGAGCATTCGGGAGAACAGTGGCCGATGTTTCG
Barcode A-55	/5Phos/AGGCCAGAGCATTCGGGTGCGAAGTGGCCGATGTTTCG
Barcode A-56	/5Phos/AGGCCAGAGCATTCGGTACGCAAGTGGCCGATGTTTCG
Barcode A-57	/5Phos/AGGCCAGAGCATTCGGTCGTAGAGTGGCCGATGTTTCG
Barcode A-58	/5Phos/AGGCCAGAGCATTCGGTCTGTCAGTGGCCGATGTTTCG
Barcode A-59	/5Phos/AGGCCAGAGCATTCGGTGTTCTAGTGGCCGATGTTTCG
Barcode A-60	/5Phos/AGGCCAGAGCATTCGTAGGATGAGTGGCCGATGTTTCG
Barcode A-61	/5Phos/AGGCCAGAGCATTCGTATCAGCAGTGGCCGATGTTTCG
Barcode A-62	/5Phos/AGGCCAGAGCATTCGTCCGTCTAGTGGCCGATGTTTCG
Barcode A-63	/5Phos/AGGCCAGAGCATTCGTCTTCACAGTGGCCGATGTTTCG
Barcode A-64	/5Phos/AGGCCAGAGCATTCGTGAAGAGAGTGGCCGATGTTTCG
Barcode A-65	/5Phos/AGGCCAGAGCATTCGTGGAACAAGTGGCCGATGTTTCG
Barcode A-66	/5Phos/AGGCCAGAGCATTCGTGGCTTCAGTGGCCGATGTTTCG
Barcode A-67	/5Phos/AGGCCAGAGCATTCGTGGTGGTAGTGGCCGATGTTTCG
Barcode A-68	/5Phos/AGGCCAGAGCATTCGTTCACGCAGTGGCCGATGTTTCG
Barcode A-69	/5Phos/AGGCCAGAGCATTCGAACTCACCGTGGCCGATGTTTCG
Barcode A-70	/5Phos/AGGCCAGAGCATTCGAAGAGATCGTGGCCGATGTTTCG
Barcode A-71	/5Phos/AGGCCAGAGCATTCGAAGGACACGTGGCCGATGTTTCG
Barcode A-72	/5Phos/AGGCCAGAGCATTCGAATCCGTCGTGGCCGATGTTTCG
Barcode A-73	/5Phos/AGGCCAGAGCATTCGAATGTTGCGTGGCCGATGTTTCG
Barcode A-74	/5Phos/AGGCCAGAGCATTCGACACGACCGTGGCCGATGTTTCG
Barcode A-75	/5Phos/AGGCCAGAGCATTCGACAGATTCGTGGCCGATGTTTCG
Barcode A-76	/5Phos/AGGCCAGAGCATTCGAGATGTACGTGGCCGATGTTTCG
Barcode A-77	/5Phos/AGGCCAGAGCATTCGAGCACCTCGTGGCCGATGTTTCG
Barcode A-78	/5Phos/AGGCCAGAGCATTCGAGCCATGCGTGGCCGATGTTTCG
Barcode A-79	/5Phos/AGGCCAGAGCATTCGAGGCTAACGTGGCCGATGTTTCG
Barcode A-80	/5Phos/AGGCCAGAGCATTCGATAGCGACGTGGCCGATGTTTCG
Barcode A-81	/5Phos/AGGCCAGAGCATTCGATCATTCCGTGGCCGATGTTTCG
Barcode A-82	/5Phos/AGGCCAGAGCATTCGATTGGCTCGTGGCCGATGTTTCG
Barcode A-83	/5Phos/AGGCCAGAGCATTCGCAAGGAGCGTGGCCGATGTTTCG
Barcode A-84	/5Phos/AGGCCAGAGCATTCGCACCTTACGTGGCCGATGTTTCG
Barcode A-85	/5Phos/AGGCCAGAGCATTCGCCATCCTCGTGGCCGATGTTTCG
Barcode A-86	/5Phos/AGGCCAGAGCATTCGCCGACAACGTGGCCGATGTTTCG
Barcode A-87	/5Phos/AGGCCAGAGCATTCGCCTAATCCGTGGCCGATGTTTCG
Barcode A-88	/5Phos/AGGCCAGAGCATTCGCCTCTATCGTGGCCGATGTTTCG
Barcode A-89	/5Phos/AGGCCAGAGCATTCGCGACACACGTGGCCGATGTTTCG
Barcode A-90	/5Phos/AGGCCAGAGCATTCGCGGATTGCGTGGCCGATGTTTCG
Barcode A-91	/5Phos/AGGCCAGAGCATTCGCTAAGGTCGTGGCCGATGTTTCG
Barcode A-92	/5Phos/AGGCCAGAGCATTCGGAACAGGCGTGGCCGATGTTTCG
Barcode A-93	/5Phos/AGGCCAGAGCATTCGGACAGTGCGTGGCCGATGTTTCG
Barcode A-94	/5Phos/AGGCCAGAGCATTCGGAGTTAGCGTGGCCGATGTTTCG
Barcode A-95	/5Phos/AGGCCAGAGCATTCGGATGAATCGTGGCCGATGTTTCG
Barcode A-96	/5Phos/AGGCCAGAGCATTCGGCCAAGACGTGGCCGATGTTTCG
Barcode A-97	/5Phos/AGGCCAGAGCATTCGCGGAAGAAGTGGCCGATGTTTCG
Barcode A-98	/5Phos/AGGCCAGAGCATTCGGTGACAAGGTGGCCGATGTTTCG
Barcode A-99	/5Phos/AGGCCAGAGCATTCGGAACCAGAGTGGCCGATGTTTCG
Barcode A-100	/5Phos/AGGCCAGAGCATTCGTTGCTGGAGTGGCCGATGTTTCG

## Sheet: Barcode B Set
Barcode ID	Sequence
Barcode B-1	CAAGCGTTGGCTTCTCGCATCTAACGTGATATCCACGTGCTTGAG
Barcode B-2	CAAGCGTTGGCTTCTCGCATCTAAACATCGATCCACGTGCTTGAG
Barcode B-3	CAAGCGTTGGCTTCTCGCATCTATGCCTAAATCCACGTGCTTGAG
Barcode B-4	CAAGCGTTGGCTTCTCGCATCTAGTGGTCAATCCACGTGCTTGAG
Barcode B-5	CAAGCGTTGGCTTCTCGCATCTACCACTGTATCCACGTGCTTGAG
Barcode B-6	CAAGCGTTGGCTTCTCGCATCTACATTGGCATCCACGTGCTTGAG
Barcode B-7	CAAGCGTTGGCTTCTCGCATCTCAGATCTGATCCACGTGCTTGAG
Barcode B-8	CAAGCGTTGGCTTCTCGCATCTCATCAAGTATCCACGTGCTTGAG
Barcode B-9	CAAGCGTTGGCTTCTCGCATCTCGCTGATCATCCACGTGCTTGAG
Barcode B-10	CAAGCGTTGGCTTCTCGCATCTACAAGCTAATCCACGTGCTTGAG
Barcode B-11	CAAGCGTTGGCTTCTCGCATCTCTGTAGCCATCCACGTGCTTGAG
Barcode B-12	CAAGCGTTGGCTTCTCGCATCTAGTACAAGATCCACGTGCTTGAG
Barcode B-13	CAAGCGTTGGCTTCTCGCATCTAACAACCAATCCACGTGCTTGAG
Barcode B-14	CAAGCGTTGGCTTCTCGCATCTAACCGAGAATCCACGTGCTTGAG
Barcode B-15	CAAGCGTTGGCTTCTCGCATCTAACGCTTAATCCACGTGCTTGAG
Barcode B-16	CAAGCGTTGGCTTCTCGCATCTAAGACGGAATCCACGTGCTTGAG
Barcode B-17	CAAGCGTTGGCTTCTCGCATCTAAGGTACAATCCACGTGCTTGAG
Barcode B-18	CAAGCGTTGGCTTCTCGCATCTACACAGAAATCCACGTGCTTGAG
Barcode B-19	CAAGCGTTGGCTTCTCGCATCTACAGCAGAATCCACGTGCTTGAG
Barcode B-20	CAAGCGTTGGCTTCTCGCATCTACCTCCAAATCCACGTGCTTGAG
Barcode B-21	CAAGCGTTGGCTTCTCGCATCTACGCTCGAATCCACGTGCTTGAG
Barcode B-22	CAAGCGTTGGCTTCTCGCATCTACGTATCAATCCACGTGCTTGAG
Barcode B-23	CAAGCGTTGGCTTCTCGCATCTACTATGCAATCCACGTGCTTGAG
Barcode B-24	CAAGCGTTGGCTTCTCGCATCTAGAGTCAAATCCACGTGCTTGAG
Barcode B-25	CAAGCGTTGGCTTCTCGCATCTAGATCGCAATCCACGTGCTTGAG
Barcode B-26	CAAGCGTTGGCTTCTCGCATCTAGCAGGAAATCCACGTGCTTGAG
Barcode B-27	CAAGCGTTGGCTTCTCGCATCTAGTCACTAATCCACGTGCTTGAG
Barcode B-28	CAAGCGTTGGCTTCTCGCATCTATCCTGTAATCCACGTGCTTGAG
Barcode B-29	CAAGCGTTGGCTTCTCGCATCTATTGAGGAATCCACGTGCTTGAG
Barcode B-30	CAAGCGTTGGCTTCTCGCATCTCAACCACAATCCACGTGCTTGAG
Barcode B-31	CAAGCGTTGGCTTCTCGCATCTGACTAGTAATCCACGTGCTTGAG
Barcode B-32	CAAGCGTTGGCTTCTCGCATCTCAATGGAAATCCACGTGCTTGAG
Barcode B-33	CAAGCGTTGGCTTCTCGCATCTCACTTCGAATCCACGTGCTTGAG
Barcode B-34	CAAGCGTTGGCTTCTCGCATCTCAGCGTTAATCCACGTGCTTGAG
Barcode B-35	CAAGCGTTGGCTTCTCGCATCTCATACCAAATCCACGTGCTTGAG
Barcode B-36	CAAGCGTTGGCTTCTCGCATCTCCAGTTCAATCCACGTGCTTGAG
Barcode B-37	CAAGCGTTGGCTTCTCGCATCTCCGAAGTAATCCACGTGCTTGAG
Barcode B-38	CAAGCGTTGGCTTCTCGCATCTCCGTGAGAATCCACGTGCTTGAG
Barcode B-39	CAAGCGTTGGCTTCTCGCATCTCCTCCTGAATCCACGTGCTTGAG
Barcode B-40	CAAGCGTTGGCTTCTCGCATCTCGAACTTAATCCACGTGCTTGAG
Barcode B-41	CAAGCGTTGGCTTCTCGCATCTCGACTGGAATCCACGTGCTTGAG
Barcode B-42	CAAGCGTTGGCTTCTCGCATCTCGCATACAATCCACGTGCTTGAG
Barcode B-43	CAAGCGTTGGCTTCTCGCATCTCTCAATGAATCCACGTGCTTGAG
Barcode B-44	CAAGCGTTGGCTTCTCGCATCTCTGAGCCAATCCACGTGCTTGAG
Barcode B-45	CAAGCGTTGGCTTCTCGCATCTCTGGCATAATCCACGTGCTTGAG
Barcode B-46	CAAGCGTTGGCTTCTCGCATCTGAATCTGAATCCACGTGCTTGAG
Barcode B-47	CAAGCGTTGGCTTCTCGCATCTCAAGACTAATCCACGTGCTTGAG
Barcode B-48	CAAGCGTTGGCTTCTCGCATCTGAGCTGAAATCCACGTGCTTGAG
Barcode B-49	CAAGCGTTGGCTTCTCGCATCTGATAGACAATCCACGTGCTTGAG
Barcode B-50	CAAGCGTTGGCTTCTCGCATCTGCCACATAATCCACGTGCTTGAG
Barcode B-51	CAAGCGTTGGCTTCTCGCATCTGCGAGTAAATCCACGTGCTTGAG
Barcode B-52	CAAGCGTTGGCTTCTCGCATCTGCTAACGAATCCACGTGCTTGAG
Barcode B-53	CAAGCGTTGGCTTCTCGCATCTGCTCGGTAATCCACGTGCTTGAG
Barcode B-54	CAAGCGTTGGCTTCTCGCATCTGGAGAACAATCCACGTGCTTGAG
Barcode B-55	CAAGCGTTGGCTTCTCGCATCTGGTGCGAAATCCACGTGCTTGAG
Barcode B-56	CAAGCGTTGGCTTCTCGCATCTGTACGCAAATCCACGTGCTTGAG
Barcode B-57	CAAGCGTTGGCTTCTCGCATCTGTCGTAGAATCCACGTGCTTGAG
Barcode B-58	CAAGCGTTGGCTTCTCGCATCTGTCTGTCAATCCACGTGCTTGAG
Barcode B-59	CAAGCGTTGGCTTCTCGCATCTGTGTTCTAATCCACGTGCTTGAG
Barcode B-60	CAAGCGTTGGCTTCTCGCATCTTAGGATGAATCCACGTGCTTGAG
Barcode B-61	CAAGCGTTGGCTTCTCGCATCTTATCAGCAATCCACGTGCTTGAG
Barcode B-62	CAAGCGTTGGCTTCTCGCATCTTCCGTCTAATCCACGTGCTTGAG
Barcode B-63	CAAGCGTTGGCTTCTCGCATCTTCTTCACAATCCACGTGCTTGAG
Barcode B-64	CAAGCGTTGGCTTCTCGCATCTTGAAGAGAATCCACGTGCTTGAG
Barcode B-65	CAAGCGTTGGCTTCTCGCATCTTGGAACAAATCCACGTGCTTGAG
Barcode B-66	CAAGCGTTGGCTTCTCGCATCTTGGCTTCAATCCACGTGCTTGAG
Barcode B-67	CAAGCGTTGGCTTCTCGCATCTTGGTGGTAATCCACGTGCTTGAG
Barcode B-68	CAAGCGTTGGCTTCTCGCATCTTTCACGCAATCCACGTGCTTGAG
Barcode B-69	CAAGCGTTGGCTTCTCGCATCTAACTCACCATCCACGTGCTTGAG
Barcode B-70	CAAGCGTTGGCTTCTCGCATCTAAGAGATCATCCACGTGCTTGAG
Barcode B-71	CAAGCGTTGGCTTCTCGCATCTAAGGACACATCCACGTGCTTGAG
Barcode B-72	CAAGCGTTGGCTTCTCGCATCTAATCCGTCATCCACGTGCTTGAG
Barcode B-73	CAAGCGTTGGCTTCTCGCATCTAATGTTGCATCCACGTGCTTGAG
Barcode B-74	CAAGCGTTGGCTTCTCGCATCTACACGACCATCCACGTGCTTGAG
Barcode B-75	CAAGCGTTGGCTTCTCGCATCTACAGATTCATCCACGTGCTTGAG
Barcode B-76	CAAGCGTTGGCTTCTCGCATCTAGATGTACATCCACGTGCTTGAG
Barcode B-77	CAAGCGTTGGCTTCTCGCATCTAGCACCTCATCCACGTGCTTGAG
Barcode B-78	CAAGCGTTGGCTTCTCGCATCTAGCCATGCATCCACGTGCTTGAG
Barcode B-79	CAAGCGTTGGCTTCTCGCATCTAGGCTAACATCCACGTGCTTGAG
Barcode B-80	CAAGCGTTGGCTTCTCGCATCTATAGCGACATCCACGTGCTTGAG
Barcode B-81	CAAGCGTTGGCTTCTCGCATCTATCATTCCATCCACGTGCTTGAG
Barcode B-82	CAAGCGTTGGCTTCTCGCATCTATTGGCTCATCCACGTGCTTGAG
Barcode B-83	CAAGCGTTGGCTTCTCGCATCTCAAGGAGCATCCACGTGCTTGAG
Barcode B-84	CAAGCGTTGGCTTCTCGCATCTCACCTTACATCCACGTGCTTGAG
Barcode B-85	CAAGCGTTGGCTTCTCGCATCTCCATCCTCATCCACGTGCTTGAG
Barcode B-86	CAAGCGTTGGCTTCTCGCATCTCCGACAACATCCACGTGCTTGAG
Barcode B-87	CAAGCGTTGGCTTCTCGCATCTCCTAATCCATCCACGTGCTTGAG
Barcode B-88	CAAGCGTTGGCTTCTCGCATCTCCTCTATCATCCACGTGCTTGAG
Barcode B-89	CAAGCGTTGGCTTCTCGCATCTCGACACACATCCACGTGCTTGAG
Barcode B-90	CAAGCGTTGGCTTCTCGCATCTCGGATTGCATCCACGTGCTTGAG
Barcode B-91	CAAGCGTTGGCTTCTCGCATCTCTAAGGTCATCCACGTGCTTGAG
Barcode B-92	CAAGCGTTGGCTTCTCGCATCTGAACAGGCATCCACGTGCTTGAG
Barcode B-93	CAAGCGTTGGCTTCTCGCATCTGACAGTGCATCCACGTGCTTGAG
Barcode B-94	CAAGCGTTGGCTTCTCGCATCTGAGTTAGCATCCACGTGCTTGAG
Barcode B-95	CAAGCGTTGGCTTCTCGCATCTGATGAATCATCCACGTGCTTGAG
Barcode B-96	CAAGCGTTGGCTTCTCGCATCTGCCAAGACATCCACGTGCTTGAG
Barcode B-97	CAAGCGTTGGCTTCTCGCATCTCGGAAGAAATCCACGTGCTTGAG
Barcode B-98	CAAGCGTTGGCTTCTCGCATCTGTGACAAGATCCACGTGCTTGAG
Barcode B-99	CAAGCGTTGGCTTCTCGCATCTGAACCAGAATCCACGTGCTTGAG
Barcode B-100	CAAGCGTTGGCTTCTCGCATCTTTGCTGGAATCCACGTGCTTGAG

## Sheet: Barcode C Set
Barcode ID	Sequence
barcode C-1	/5Phos/CGCGCTGCATACTTGAACGTGATTTGGATAAGATATCG
barcode C-2	/5Phos/CGCGCTGCATACTTGAAACATCGTTGGATAAGATATCG
barcode C-3	/5Phos/CGCGCTGCATACTTGATGCCTAATTGGATAAGATATCG
barcode C-4	/5Phos/CGCGCTGCATACTTGAGTGGTCATTGGATAAGATATCG
barcode C-5	/5Phos/CGCGCTGCATACTTGACCACTGTTTGGATAAGATATCG
barcode C-6	/5Phos/CGCGCTGCATACTTGACATTGGCTTGGATAAGATATCG
barcode C-7	/5Phos/CGCGCTGCATACTTGCAGATCTGTTGGATAAGATATCG
barcode C-8	/5Phos/CGCGCTGCATACTTGCATCAAGTTTGGATAAGATATCG
barcode C-9	/5Phos/CGCGCTGCATACTTGCGCTGATCTTGGATAAGATATCG
barcode C-10	/5Phos/CGCGCTGCATACTTGACAAGCTATTGGATAAGATATCG
barcode C-11	/5Phos/CGCGCTGCATACTTGCTGTAGCCTTGGATAAGATATCG
barcode C-12	/5Phos/CGCGCTGCATACTTGAGTACAAGTTGGATAAGATATCG
barcode C-13	/5Phos/CGCGCTGCATACTTGAACAACCATTGGATAAGATATCG
barcode C-14	/5Phos/CGCGCTGCATACTTGAACCGAGATTGGATAAGATATCG
barcode C-15	/5Phos/CGCGCTGCATACTTGAACGCTTATTGGATAAGATATCG
barcode C-16	/5Phos/CGCGCTGCATACTTGAAGACGGATTGGATAAGATATCG
barcode C-17	/5Phos/CGCGCTGCATACTTGAAGGTACATTGGATAAGATATCG
barcode C-18	/5Phos/CGCGCTGCATACTTGACACAGAATTGGATAAGATATCG
barcode C-19	/5Phos/CGCGCTGCATACTTGACAGCAGATTGGATAAGATATCG
barcode C-20	/5Phos/CGCGCTGCATACTTGACCTCCAATTGGATAAGATATCG
barcode C-21	/5Phos/CGCGCTGCATACTTGACGCTCGATTGGATAAGATATCG
barcode C-22	/5Phos/CGCGCTGCATACTTGACGTATCATTGGATAAGATATCG
barcode C-23	/5Phos/CGCGCTGCATACTTGACTATGCATTGGATAAGATATCG
barcode C-24	/5Phos/CGCGCTGCATACTTGAGAGTCAATTGGATAAGATATCG
barcode C-25	/5Phos/CGCGCTGCATACTTGAGATCGCATTGGATAAGATATCG
barcode C-26	/5Phos/CGCGCTGCATACTTGAGCAGGAATTGGATAAGATATCG
barcode C-27	/5Phos/CGCGCTGCATACTTGAGTCACTATTGGATAAGATATCG
barcode C-28	/5Phos/CGCGCTGCATACTTGATCCTGTATTGGATAAGATATCG
barcode C-29	/5Phos/CGCGCTGCATACTTGATTGAGGATTGGATAAGATATCG
barcode C-30	/5Phos/CGCGCTGCATACTTGCAACCACATTGGATAAGATATCG
barcode C-31	/5Phos/CGCGCTGCATACTTGGACTAGTATTGGATAAGATATCG
barcode C-32	/5Phos/CGCGCTGCATACTTGCAATGGAATTGGATAAGATATCG
barcode C-33	/5Phos/CGCGCTGCATACTTGCACTTCGATTGGATAAGATATCG
barcode C-34	/5Phos/CGCGCTGCATACTTGCAGCGTTATTGGATAAGATATCG
barcode C-35	/5Phos/CGCGCTGCATACTTGCATACCAATTGGATAAGATATCG
barcode C-36	/5Phos/CGCGCTGCATACTTGCCAGTTCATTGGATAAGATATCG
barcode C-37	/5Phos/CGCGCTGCATACTTGCCGAAGTATTGGATAAGATATCG
barcode C-38	/5Phos/CGCGCTGCATACTTGCCGTGAGATTGGATAAGATATCG
barcode C-39	/5Phos/CGCGCTGCATACTTGCCTCCTGATTGGATAAGATATCG
barcode C-40	/5Phos/CGCGCTGCATACTTGCGAACTTATTGGATAAGATATCG
barcode C-41	/5Phos/CGCGCTGCATACTTGCGACTGGATTGGATAAGATATCG
barcode C-42	/5Phos/CGCGCTGCATACTTGCGCATACATTGGATAAGATATCG
barcode C-43	/5Phos/CGCGCTGCATACTTGCTCAATGATTGGATAAGATATCG
barcode C-44	/5Phos/CGCGCTGCATACTTGCTGAGCCATTGGATAAGATATCG
barcode C-45	/5Phos/CGCGCTGCATACTTGCTGGCATATTGGATAAGATATCG
barcode C-46	/5Phos/CGCGCTGCATACTTGGAATCTGATTGGATAAGATATCG
barcode C-47	/5Phos/CGCGCTGCATACTTGCAAGACTATTGGATAAGATATCG
barcode C-48	/5Phos/CGCGCTGCATACTTGGAGCTGAATTGGATAAGATATCG
barcode C-49	/5Phos/CGCGCTGCATACTTGGATAGACATTGGATAAGATATCG
barcode C-50	/5Phos/CGCGCTGCATACTTGGCCACATATTGGATAAGATATCG

## Sheet: Barcode D Set
Barcode ID	Sequence
barcode D-1	GTCAGATGTGTATAAGAGACAGAACGTGATCCCATGATCGTCCGA
barcode D-2	GTCAGATGTGTATAAGAGACAGAAACATCGCCCATGATCGTCCGA
barcode D-3	GTCAGATGTGTATAAGAGACAGATGCCTAACCCATGATCGTCCGA
barcode D-4	GTCAGATGTGTATAAGAGACAGAGTGGTCACCCATGATCGTCCGA
barcode D-5	GTCAGATGTGTATAAGAGACAGACCACTGTCCCATGATCGTCCGA
barcode D-6	GTCAGATGTGTATAAGAGACAGACATTGGCCCCATGATCGTCCGA
barcode D-7	GTCAGATGTGTATAAGAGACAGCAGATCTGCCCATGATCGTCCGA
barcode D-8	GTCAGATGTGTATAAGAGACAGCATCAAGTCCCATGATCGTCCGA
barcode D-9	GTCAGATGTGTATAAGAGACAGCGCTGATCCCCATGATCGTCCGA
barcode D-10	GTCAGATGTGTATAAGAGACAGACAAGCTACCCATGATCGTCCGA
barcode D-11	GTCAGATGTGTATAAGAGACAGCTGTAGCCCCCATGATCGTCCGA
barcode D-12	GTCAGATGTGTATAAGAGACAGAGTACAAGCCCATGATCGTCCGA
barcode D-13	GTCAGATGTGTATAAGAGACAGAACAACCACCCATGATCGTCCGA
barcode D-14	GTCAGATGTGTATAAGAGACAGAACCGAGACCCATGATCGTCCGA
barcode D-15	GTCAGATGTGTATAAGAGACAGAACGCTTACCCATGATCGTCCGA
barcode D-16	GTCAGATGTGTATAAGAGACAGAAGACGGACCCATGATCGTCCGA
barcode D-17	GTCAGATGTGTATAAGAGACAGAAGGTACACCCATGATCGTCCGA
barcode D-18	GTCAGATGTGTATAAGAGACAGACACAGAACCCATGATCGTCCGA
barcode D-19	GTCAGATGTGTATAAGAGACAGACAGCAGACCCATGATCGTCCGA
barcode D-20	GTCAGATGTGTATAAGAGACAGACCTCCAACCCATGATCGTCCGA
barcode D-21	GTCAGATGTGTATAAGAGACAGACGCTCGACCCATGATCGTCCGA
barcode D-22	GTCAGATGTGTATAAGAGACAGACGTATCACCCATGATCGTCCGA
barcode D-23	GTCAGATGTGTATAAGAGACAGACTATGCACCCATGATCGTCCGA
barcode D-24	GTCAGATGTGTATAAGAGACAGAGAGTCAACCCATGATCGTCCGA
barcode D-25	GTCAGATGTGTATAAGAGACAGAGATCGCACCCATGATCGTCCGA
barcode D-26	GTCAGATGTGTATAAGAGACAGAGCAGGAACCCATGATCGTCCGA
barcode D-27	GTCAGATGTGTATAAGAGACAGAGTCACTACCCATGATCGTCCGA
barcode D-28	GTCAGATGTGTATAAGAGACAGATCCTGTACCCATGATCGTCCGA
barcode D-29	GTCAGATGTGTATAAGAGACAGATTGAGGACCCATGATCGTCCGA
barcode D-30	GTCAGATGTGTATAAGAGACAGCAACCACACCCATGATCGTCCGA
barcode D-31	GTCAGATGTGTATAAGAGACAGGACTAGTACCCATGATCGTCCGA
barcode D-32	GTCAGATGTGTATAAGAGACAGCAATGGAACCCATGATCGTCCGA
barcode D-33	GTCAGATGTGTATAAGAGACAGCACTTCGACCCATGATCGTCCGA
barcode D-34	GTCAGATGTGTATAAGAGACAGCAGCGTTACCCATGATCGTCCGA
barcode D-35	GTCAGATGTGTATAAGAGACAGCATACCAACCCATGATCGTCCGA
barcode D-36	GTCAGATGTGTATAAGAGACAGCCAGTTCACCCATGATCGTCCGA
barcode D-37	GTCAGATGTGTATAAGAGACAGCCGAAGTACCCATGATCGTCCGA
barcode D-38	GTCAGATGTGTATAAGAGACAGCCGTGAGACCCATGATCGTCCGA
barcode D-39	GTCAGATGTGTATAAGAGACAGCCTCCTGACCCATGATCGTCCGA
barcode D-40	GTCAGATGTGTATAAGAGACAGCGAACTTACCCATGATCGTCCGA
barcode D-41	GTCAGATGTGTATAAGAGACAGCGACTGGACCCATGATCGTCCGA
barcode D-42	GTCAGATGTGTATAAGAGACAGCGCATACACCCATGATCGTCCGA
barcode D-43	GTCAGATGTGTATAAGAGACAGCTCAATGACCCATGATCGTCCGA
barcode D-44	GTCAGATGTGTATAAGAGACAGCTGAGCCACCCATGATCGTCCGA
barcode D-45	GTCAGATGTGTATAAGAGACAGCTGGCATACCCATGATCGTCCGA
barcode D-46	GTCAGATGTGTATAAGAGACAGGAATCTGACCCATGATCGTCCGA
barcode D-47	GTCAGATGTGTATAAGAGACAGCAAGACTACCCATGATCGTCCGA
barcode D-48	GTCAGATGTGTATAAGAGACAGGAGCTGAACCCATGATCGTCCGA
barcode D-49	GTCAGATGTGTATAAGAGACAGGATAGACACCCATGATCGTCCGA
barcode D-50	GTCAGATGTGTATAAGAGACAGGCCACATACCCATGATCGTCCGA
