# Supplementary material for: Spatially Resolved Panoramic in vivo CRISPR Screen via Perturb-DBiT
Source: Research Square preprint supplement (doi:10.21203/rs.3.rs-6481967/v1), 2025-05-08
Supplement: Supplementary file 17 [file Table_S4.xlsx]

## Sheet: CRISPR KO Libraries 
Brunello_HT29 Lung Colonization	Brie_E0771 Syngeneic Lung	mTSG_GEMM				Epigenetic Tumor Xenograft
https://www.addgene.org/pooled-library/broadgpp-human-knockout-brunello/	https://www.addgene.org/pooled-library/broadgpp-mouse-knockout-brie/	sgRNA_name	Spacer sequence N20			gene	sequence
		Fat1_sg1	GGGCAGTGTTTCAAAATCCA			Anp32b.g1	AAATCCCCACCACTCACCAA
		Fat1_sg2	GGAACACGAGCCGTCAGCGG			Anp32b.g2	CAATGGATGGAAAAATTGAG
		Fat1_sg3	GGATTTCTGTTCTGCATCAA			Ascl2.g1	GCGGCGATCTGGAGCAACCG
		Fat1_sg4	GGTCCCATCTGTTGCCTCCA			Ascl2.g2	GCACAGGAAAAGTGCTCGCG
		Fat1_sg5	GTTTGGAGATCCACTCGATA			Ash2l.g1	GACGTGGCAGTCTCGAACAC
		Arid1b_sg1	GTACCCAGTGCAAGCTACAG			Ash2l.g2	TCACGACGTGTCTATTCCAA
		Arid1b_sg2	GGGTACCCCGCTATATGTTG			Bcl6.g1	GTTGACAGGCCACTGTACAG
		Arid1b_sg3	GCATCTGGCCCCCAGGAGAT			Bcl6.g2	CAATCAGAATGCCAAACCCG
		Arid1b_sg4	GGTCCGTACTGAGACATCTG			Bmi1.g1	ACTGTCTTTATAGCTGCCAA
		Arid1b_sg5	GATTCTGACTGGCTTCCAGG			Bmi1.g2	ACCACTCCTGAACATAAGGT
		Trp53_sg1	GTGAAATACTCTCCATCAAG			Cpsf6.g1	ACGTTGTGTACACTTACACT
		Trp53_sg2	GGGAGAGGCGCTTGTGCAGG			Cpsf6.g2	TTCAGATCCAACACCAACAA
		Trp53_sg3	GCAAAGAGAGGTACGCAGGC			Daxx.g1	GAGCAGCGAATTCCGTACCG
		Trp53_sg4	GCGGTTCATGCCCCCCATGC			Daxx.g2	GGAGGAACGGAACCACCTCA
		Trp53_sg5	GGTATACTCAGAGCCGGCCT			Dmap1.g1	GCCTGGCACAGCCCTCACGT
		Grlf1_sg1	GCCATGGCTGAAGGGGAGCC			Dmap1.g2	TCAGGGGTATCGGACAGTGA
		Grlf1_sg2	GACTCTGTAGGTGACAGCAA			Eaf1.g1	CAGTTGGATGACATCAAAAG
		Grlf1_sg3	GCTCCTAAACCTACTTGTTC			Eaf1.g2	GAACACCGTCATTGGCGGCG
		Grlf1_sg4	GCATGCTGTATGGTACCAGG			Elp3.g1	GCGATGATATCCACCAGGCG
		Grlf1_sg5	GAAGGCATCTACCGGGTCAG			Elp3.g2	TACCCAACCCTGGTTATCCG
		Npm1_sg1	GGACGATGATGAGGACGATG			Epc1.g1	CGTCTTCTAAAAGCCACGTA
		Npm1_sg2	GTGTAATTTCAAAGCCCCCT			Epc1.g2	CTATGAGTCCATATACCCTG
		Npm1_sg3	GTGGACAGCATCTAGTAGGT			Ezh2.g1	AGAGTACATTATAGGCACCG
		Npm1_sg4	GGGCGGTTCTCTTCCCAAAG			Ezh2.g2	TATCGTAGTAAGTACCAATG
		Npm1_sg5	GGAAGAGAACCGCCCTATTG			Gatad1.g1	AGACTACGTCGTCCTCCATG
		Ep300_sg1	GCATATGCTCGTAAAGTGGA			Gatad1.g2	CCGTACTATGCTCAGATCAG
		Ep300_sg2	GATGAGTGAAAATGCTGGTG			Glyr1.g1	AAGTTGAAACGACTTCAGCG
		Ep300_sg3	GGCTGAGCTGCTGTTGGCAA			Glyr1.g2	GAATCGGCGTAATTCCAGTG
		Ep300_sg4	GCCCTAGGTGCTAGTCCTAT			Gtf3c4.g1	AAGAAGACACCAAAACACAT
		Ep300_sg5	GCTAGTCCTATGGGTGTAAA			Gtf3c4.g2	CAGATGTCTTTGGCTCAGTG
		Mll2_sg1	GCCGGCTATGTCGGGCCTGT			Hmgb2.g1	CCCATAGACCATGTCTGCAA
		Mll2_sg2	GGGATTCAGTTCTGCTGAGC			Hmgb2.g2	GAAATGCTCCGAGAGATGGA
		Mll2_sg3	GTGTGTGAGACATGTGACAA			Ino80.g1	GGGTTGCGGAATATCCTCAC
		Mll2_sg4	GCAGGCAGGTCCTCCATAGG			Ino80.g2	TATTCGAACGGCAAGAAACG
		Mll2_sg5	GCCTCCTCTGCCGGAGAAAG			Keap1.g1	GATGCACGCGTGGAACACCT
		Setd2_sg1	GACTGTGAATGGACAGCTGA			Keap1.g2	GTATATCTACATGCACTTCG
		Setd2_sg2	GTCTTCTCAAAACATTTCAG			Mcrs1.g1	GAACTTCCCGAAGGGTGAAG
		Setd2_sg3	GCACTGATGGAAAATGGTGA			Mcrs1.g2	GGAGCAGCTGCTGAGCAAAG
		Setd2_sg4	GACTACCAGTTCCAAAGATA			Msl1.g1	TCAGACGGGCTCTATCGTGG
		Setd2_sg5	GAAGCTTCTGGTTACTTTCC			Msl1.g2	TATAAGGAAGAGCCCTCTCG
		Cdkn2a_sg1	GGGATTGGCCGCGAAGTTCC			Mta2.g1	TGCGTCCCGAGATATCACTC
		Cdkn2a_sg2	GGGGTACGACCGAAAGAGTT			Mta2.g2	TCTGCCACACTTACTAAGTG
		Cdkn2a_sg3	GGGTCGCCTGCCGCTCGACT			Nsd1.g1	TCTGAGCACTAGGTTGACAT
		Cdkn2a_sg4	GGGAACGTCGCCCAGACCGA			Nsd1.g2	GGATAGCAAACAGCCTCACA
		Cdkn2a_sg5	GGGGTACGACCGAAAGAGTT			NTC1.g1	CCGTGATTTCGGTAGCGTAC
		Rpl7_sg1	GTACCTGCACCAGGAAAACC			NTC1.g2	TAATGAGTAACGCTCATCGG
		Rpl7_sg2	GTGGAGCCATACATTGCATG			NTC2.g1	CCGGTTTATAAATTACGTGG
		Rpl7_sg3	GGGTGAGTTTTCTGTCTAGT			NTC2.g2	ACCGGACTGCGATATGCCGT
		Rpl7_sg4	GCCTTTGTCATCAGAATTCG			NTC3.g1	GCGCGAGGGCACCGACAAGT
		Rpl7_sg5	GAAGGCAAAGCACTATCACA			NTC3.g2	ACGCTCTTGGCAGATAATCG
		Pbrm1_sg1	GCAATGGTCTTGAGATCTAT			NTC4.g1	GACCTCGCAATTGAGCGCTC
		Pbrm1_sg2	GACCATTGCTCAGAGGATAC			NTC4.g2	TGAGGTTACCGCCGGCTTTT
		Pbrm1_sg3	GCCTGGGTCTCAAGTATTCA			NTC5.g1	GTGCAACGACTGACCCGCGG
		Pbrm1_sg4	GCCAAAACATACAATGAGCC			NTC5.g2	ACGCTGTTCGTAACCGCGGG
		Pbrm1_sg5	GTGCGAAGGACCTGTCAGCC			Papss1.g1	TCAGCCAAACTGTGCAACCA
		Pik3r1_sg1	GACTGCATGGGCAGAAGGGA			Papss1.g2	CTCATACACCAGAGCGAACG
		Pik3r1_sg2	GAGACGGCACTTTCCTTGTC			Ppp3r1.g1	AGCAGAACCCTTTAGTACAG
		Pik3r1_sg3	GTTGGCTACAGTAGTGGGCT			Ppp3r1.g2	GTTCAGTGTCAAAGGCGATA
		Pik3r1_sg4	GGCAGTGCTGCAGGCAAAAG			Prdm1.g1	TTGGAACTAATGCCGTACGG
		Pik3r1_sg5	GGCTGACGCAGAAAGGTGTG			Prdm1.g2	GGATAGGATAAACCACCCGA
		Rps19_sg1	GGCCGCAAGCTGACGCCTCA			Prmt2.g1	CGGCATCATCTGGCCAACCA
		Rps19_sg2	GCCTCAGGGACAGAGAGACC			Prmt2.g2	TCTTATCCTGAGACAAACCA
		Rps19_sg3	GTCCCTGAGGCGTCAGCTTG			Rad21.g1	AATGATGGCGGTATATTAGG
		Rps19_sg4	GGGCCGCAAGCTGACGCCTC			Rad21.g2	GACAACTCTCGTCCCAAACG
		Rps19_sg5	GTTGAAACAGAGCGGGGGGG			Rbbp7.g1	CTCCTCACATTAGAATTCGG
		Bcor_sg1	GTGGATGAAAGGCTCTTCAT			Rbbp7.g2	TACACCGTTTCTGTATGACC
		Bcor_sg2	GGTTTTGCACAGTCTCTTCC			Rbm14.g1	TCCACCATATGGGCCAAGCG
		Bcor_sg3	GACCTCAGGCTGAACAGCCT			Rbm14.g2	CTCTTCGTATGGGGTTCGTG
		Bcor_sg4	GGCCCAGGCTGTTCAGCCTG			Setd5.g1	CCAGACTCGAGAAGACCGAA
		Bcor_sg5	GTCCACCACCCCCTGGTCAC			Setd5.g2	TGAGACACATGATTGCAGAT
		Mll3_sg1	GTTGGCACTGATTTCATAAC			Sfpq.g1	AGAGAGATTTCGAACAGACA
		Mll3_sg2	GGGAGAAGATAGCAAGATGC			Sfpq.g2	GAACAGTTAGATGACGAAGA
		Mll3_sg3	GTGGCTACTGACCAAACCCA			Smc1a.g1	CGAGTAGACCATGCTGACAA
		Mll3_sg4	GAGAATTCCTAACAGCTATG			Smc1a.g2	TGGAGGTCACCAACGCCACA
		Mll3_sg5	GCTGCCGATACTCCAAACTT			Smc3.g1	AAGAAGAGCGAGGAATTGCG
		Kdm6a_sg1	GCAACTATTTTACAACAATT			Smc3.g2	TCTGCTAAGCGAGAAACGAG
		Kdm6a_sg2	GGTAAATTAAAACACTCACC			Taf2.g1	TATCCTTATCCACAACAAAG
		Kdm6a_sg3	GTAAATTAAAACACTCACCT			Taf2.g2	TTACCTCTTTAATCCAATGG
		Kdm6a_sg4	GCAGCATTTTCAGTTAGCTT			Tasor.g1	CACTCTAAAAGGCACTACCG
		Kdm6a_sg5	GGCTATTAAAGCATTTCAGG			Tasor.g2	ATAGGCTCTATATGCCAAGA
		Atm_sg1	GTGATTTTGATCTCGTGCCT			Tet2.g1	GGTATATCGGAGATCGAGTG
		Atm_sg2	GCAAGGTACACTGTAATCAG			Tet2.g2	ACTCCATCAGACAAAACGCA
		Atm_sg3	GTGCTTATGAATCCATGAAA			Yeats4.g1	ATAAACGATTGGCTTAACGA
		Atm_sg4	GTCCAAATATATAGTAAGGT			Yeats4.g2	GCTTCACGTACACAGTCCAC
		Atm_sg5	GAGACTTGAGGAAAATGTTA			Zmynd8.g1	TTTACGTGGAGAACATACGG
		Rnf43_sg1	GGGGCCAAGGGTATGCCAGA			Zmynd8.g2	AACGGGATCCAACTTACACA
		Rnf43_sg2	GACTGTGGGATCCCAGTTTC
		Rnf43_sg3	GTAGGTAGGAGGTGAACTCA
		Rnf43_sg4	GCATGTTCAACATCGTAGGT
		Rnf43_sg5	GGAGTCTTCTGCCTGGTTCC
		Vhl_sg1	GGACTACCCAAGTGTGCGGA
		Vhl_sg2	GCACCTTGAGAGTCAGCACC
		Vhl_sg3	GGTTAACCAGAAGTCCATCA
		Vhl_sg4	GTGCCATCCCTCAATGTCGA
		Vhl_sg5	GTCCTGAGGAGATGGAGGCT
		Sf3b3_sg1	GTCTCCTTCTTCTAGAGGCA
		Sf3b3_sg2	GGCAAAACAGAATAGGAGAG
		Sf3b3_sg3	GGCAATTTGATACAAGTAAC
		Sf3b3_sg4	GCAATTTGATACAAGTAACT
		Sf3b3_sg5	GCACAGTATCAAAATACTTG
		Map2k4_sg1	GACAAAGTTGATGAAACTGG
		Map2k4_sg2	GCCGATTTCCTTATCCAAAG
		Map2k4_sg3	GACCCAAGTGCATCAAGACA
		Map2k4_sg4	GCACTTGGGTCTATTCTTTC
		Map2k4_sg5	GGGCGACTGTTGGATCTGTA
		Arid2_sg1	GTCCAGTAAAAGCTGGAGGA
		Arid2_sg2	GAGTGGTTCTGAAATCCACA
		Arid2_sg3	GGAGAGCAATGTTAAGCTCT
		Arid2_sg4	GACTGTGTGCAGAGAGCAAC
		Arid2_sg5	GTCACTTCTCATTACAGTTT
		Tgfbr2_sg1	GATGCCCTGCAGAGGAAAGG
		Tgfbr2_sg2	GGCAGAGCGCTTCAGTGAGC
		Tgfbr2_sg3	GACAGTGTGCTGAGAGACCG
		Tgfbr2_sg4	GGCCGGAAATTCCCAGCTTC
		Tgfbr2_sg5	GTGTTTCTTTTGGTCTTAGG
		Atrx_sg1	GTGTTTCTCCCTTTAAGTCT
		Atrx_sg2	GGCAGCCCCAATTCTGCTCA
		Atrx_sg3	GATATTAGCCGTGACTCAGA
		Atrx_sg4	GAAGACAAAGATGATTTTAA
		Atrx_sg5	GGTTTCCTACAAAAGAGTTA
		Rpl22_sg1	GCTCATTGGTTGGTTTCTGC
		Rpl22_sg2	GCCTTTCTCCAAAAGGTATG
		Rpl22_sg3	GGTTAGTATGGCTCCGCGTG
		Rpl22_sg4	GCGTTACTTCCAGATTAACC
		Rpl22_sg5	GCGTTACTTCCAGATTAACC
		Fubp1_sg1	GATAAACCTCTTAGGATTAC
		Fubp1_sg2	GGAACGGGCTGGTGTTAAAA
		Fubp1_sg3	GTCTTCCCTTTTCAACAATC
		Fubp1_sg4	GAAAAGGGAAGACCAGCCCC
		Fubp1_sg5	GTTAGCATACAAGACCTTTC
		Pcna_sg1	GGAGGCGGTGAGTAGTAAGG
		Pcna_sg2	GAGGAGGCGGTGAGTAGTAA
		Pcna_sg3	GAATTTTGGACATGCTAGGG
		Pcna_sg4	GTGAGCCTGTTTTCTCCTCT
		Pcna_sg5	GGTTACCTAGAGGAGAAAAC
		Notch1_sg1	GTATACACCTTCATAACCTG
		Notch1_sg2	GCAGTGGCCATTGTGCAGAC
		Notch1_sg3	GGCACCTGGTGAAAGAGGCA
		Notch1_sg4	GCCAACCCTTGTGAGCACGC
		Notch1_sg5	GAGCACACTCATCCACGTCC
		Casp8_sg1	GGTGACAAGGGTGTCGTCTA
		Casp8_sg2	GTGTCGTCTATGGAACGGAT
		Casp8_sg3	GGTAAACTTTGTCTGAAGTC
		Casp8_sg4	GGAGTTGGGTTATGTCTTCC
		Casp8_sg5	GACTCACTGTCTTGTTCTCT
		Stag2_sg1	GAGTGTTTGTACATAGATAC
		Stag2_sg2	GCAGAACGGAATAAAATGAT
		Stag2_sg3	GATGACTGCTTTGGTAAATG
		Stag2_sg4	GATTACCCACTTACCATGGC
		Stag2_sg5	GAGGACCAGCCATGGTAAGT
		Kdm5c_sg1	GCTCTGCAGAGTATATTCCC
		Kdm5c_sg2	GCATGTAGGTGATGCAGGGC
		Kdm5c_sg3	GTTTGTCATCTTCATCTCCT
		Kdm5c_sg4	GTATGCCGAATGTGTTCCCG
		Kdm5c_sg5	GACCTTCCTAGAAGGCAAGG
		Smad4_sg1	GTCCATTTCAAAGTAAGCAA
		Smad4_sg2	GCAATGGAGCACCAGTACTC
		Smad4_sg3	GATGATTGGAAATGGGAGGC
		Smad4_sg4	GTCACAACAGGGCAGCTTGA
		Smad4_sg5	GATGGCTATGTGGATCCTTC
		Cdkn1a_sg1	GGGCTCCCGTGGGCACTTCA
		Cdkn1a_sg2	GAAAACCCTGAAGTGCCCAC
		Cdkn1a_sg3	GAAGATTCCCCGGGTGGGCC
		Cdkn1a_sg4	GGGTGGGCCCGGAACATCTC
		Cdkn1a_sg5	GATTGCGATGCGCTCATGGC
		Runx1_sg1	GCGCGCGGGGGGCATGTTGG
		Runx1_sg2	GCCTCCTCCAGGCGCGCGGG
		Runx1_sg3	GTCCTAGTGTAGGGACCGGG
		Runx1_sg4	GAGGGTTGGGCGTGGGGGCT
		Runx1_sg5	GTAGAGGTGCGTATCTGTCA
		Rb1_sg1	GTTCGAGGTGAACCATTAAT
		Rb1_sg2	GAGGTCAGAACAGGAGCGCT
		Rb1_sg3	GGCTCTCTGAGTAGTGCAGG
		Rb1_sg4	GAATCATGGAATCCCTTGCA
		Rb1_sg5	GAACCTTTTTATTCCTAGGA
		Zc3h13_sg1	GAGGCAGAACGTCGTAAAGA
		Zc3h13_sg2	GTTCTCTTCCGGCGAGGAGA
		Zc3h13_sg3	GGAGGTGGACTCGGAGTGCG
		Zc3h13_sg4	GAGATGGGAAGGACAGAGGC
		Zc3h13_sg5	GACTTTCTCAGAGAAGGTGA
		Bap1_sg1	GAACCGACAAACAGTCCTGG
		Bap1_sg2	GGTCAGGCACCACTGCCATC
		Bap1_sg3	GTCCTCTCCCCAGGGCCCTA
		Bap1_sg4	GTGGACAGATAAAGCTCGAA
		Bap1_sg5	GCTATGTGCCTATCACAGGG
		Map3k1_sg1	GGGATACCTACCTGAATCCA
		Map3k1_sg2	GGGAGGTGGGGGACTCCACG
		Map3k1_sg3	GTCCCCTTTGTAGATCTAAG
		Map3k1_sg4	GGAGATCCCATGACTTCTAC
		Map3k1_sg5	GGGGAGGGGACACCTACAGA
		Rasa1_sg1	GAGATTATTCTCTGTATTTT
		Rasa1_sg2	GTCTTAATGTCTTTCCTTTA
		Rasa1_sg3	GATCTTCTTCTCGGCCCTAA
		Rasa1_sg4	GTTCACAATGAGTTAGAAGA
		Rasa1_sg5	GGACACTGAGATATATCTAT
		Nf1_sg1	GTCCATGGTAGTTGATCTTA
		Nf1_sg2	GCTGCAGCCAAGAGCTCTTG
		Nf1_sg3	GATTATCCGAATTCTTAGCA
		Nf1_sg4	GACAATCTGATGCTATATCT
		Nf1_sg5	GGTATATTTTCCAAGTCTTG
		Kansl1_sg1	GTGGAGAGCTGTCTCACCAG
		Kansl1_sg2	GGGTGTGGAGGTGTCTGATG
		Kansl1_sg3	GGTCATGCACAGGTGGCGGC
		Kansl1_sg4	GATGGCACAGCTCTGAAGAG
		Kansl1_sg5	GCTCTGGAAGTGCAGGCTTG
		Gata3_sg1	GGTGGTGAGGTCCGAAGGAG
		Gata3_sg2	GGAAGGGTGGTGAGGTCCGA
		Gata3_sg3	GCCCACAGGCATTGCAGACC
		Gata3_sg4	GAGGAACGCTAATGGGGACC
		Gata3_sg5	GTACCATCTCGCCGCCACAG
		Pten_sg1	GGTTCATTGTCACTAACATC
		Pten_sg2	GAATGCTGATCTTCATCAAA
		Pten_sg3	GAACTTGTCCTCCCGCCGCG
		Pten_sg4	GTTCTTCATACCAGGACCAG
		Pten_sg5	GGGAATTGTGACTCCCTGAT
		Rps18_sg1	GCTGCAGAAGAAAAAGATAC
		Rps18_sg2	GCGCCACTTTTGGGGGTAAG
		Rps18_sg3	GAACCTAGATTTTGAGACAG
		Rps18_sg4	GAATTTTCTTCAGCCTCTCC
		Rps18_sg5	GAGGGCTGCGCCACTTTTGG
		Arid1a_sg1	GGCTACCCAAATATGAATCA
		Arid1a_sg2	GGACCCCCATATCCTATGGG
		Arid1a_sg3	GCTGCCTAGGATAGCCTCCT
		Arid1a_sg4	GACGCATGAGCCATTCTCCC
		Arid1a_sg5	GAAGTGTACTGGGGCATCTG
		Apc_sg1	GGAGAGAGTTTACTTCCGAG
		Apc_sg2	GTCTTTGTCCTGAGGCCTTA
		Apc_sg3	GTGGAGTGCTGCACTGGCCC
		Apc_sg4	GCTGTGAGTGAATGATGTTG
		Apc_sg5	GCCAGTGTTTTGAGTTCTAG
		Ctcf_sg1	GTCTACAAGCATAATCACAC
		Ctcf_sg2	GATTATGCTTGTAGACAGGT
		Ctcf_sg3	GATGGCGTAGAGGGGGAAAA
		Ctcf_sg4	GATAACTGTGCTGGTCCAGA
		Ctcf_sg5	GCTATGACAGTGTCACAATG
		Cic_sg1	GTACAGGCAGGAGGCAACTG
		Cic_sg2	GCAGGAGGCAACTGGGGACT
		Cic_sg3	GGGGTGCACAGTCTTGATGG
		Cic_sg4	GTGTAGCCGTTCTGCTCCAC
		Cic_sg5	GTACCTTGGCCACTAGTGGG
		Polr2a_sg1	GTGGAACGGCACATGTGTGA
		Polr2a_sg2	GGAACGGCACATGTGTGATG
		Polr2a_sg3	GACTTCAGGAATTAGTACGC
		Polr2a_sg4	GAAGGTCACTGGGCTTAGGA
		Polr2a_sg5	GTCTGCAGATGAAGGTCACT
		Rps11_sg1	GACTCCTTGTCTGACCCCAC
		Rps11_sg2	GAGGACCATTGTCATCCGCC
		Rps11_sg3	GGATGTAATGGAGATAGTCC
		Rps11_sg4	GTCACCTGAAACAGGGGGAC
		Rps11_sg5	GTCGGATCCTGTCTGGTGAG
		Stk11_sg1	GGAGCCCGAGGAGGGGTTTG
		Stk11_sg2	GGGCGCAGGCCTTCCTGGAG
		Stk11_sg3	GAAGAAACACCCTCTGGCTG
		Stk11_sg4	GTGTCTGGGCTTGGTGGGAT
		Stk11_sg5	GTGCTGCCTAATCTGTCGGA
		Cdkn1b_sg1	GCTCCACAGTGCCAGCGTTC
		Cdkn1b_sg2	GCGAAGAAGAATCTAAGAGG
		Cdkn1b_sg3	GGAGAAGCACTGCCGGGATA
		Cdkn1b_sg4	GGTTAGCGGAGCAGTGTCCA
		Cdkn1b_sg5	GGTGCTGGCGCAGGAGAGCC
		Cdh1_sg1	GAAAACAGCCAAGGTTTGTA
		Cdh1_sg2	GGGTCAAGTGCCTGAGAATG
		Cdh1_sg3	GAGTTACCCTACATACACTC
		Cdh1_sg4	GTTCAGGCTGCTGACCTTCA
		Cdh1_sg5	GGAGGTTCCTGTCAAAGGAG
		B2m_sg1	GGTCTTGGGCTCGGCCATAC
		B2m_sg2	GGGTGAATTCAGTGTGAGCC
		B2m_sg3	GAGCCCAAGACCGTCTACTG
		B2m_sg4	GTATGTATCAGTCTCAGTGG
		B2m_sg5	GGTCGCTTCAGTCGTCAGCA
		Fbxw7_sg1	GCCGCTTGCAGCAGGTCTTT
		Fbxw7_sg2	GCAGCAGGTCTTTGGGTTCC
		Fbxw7_sg3	GAGTGTATACATACTTTATA
		Fbxw7_sg4	GTATGCATCTCCATGAAAAA
		Fbxw7_sg5	GATCTGTACACTTTTCTTAT
		Nkx2-1_sg1	GCGGGGCGCACTGGGCAGCG
		Nkx2-1_sg2	GCCACCGCTGCCCACTGAGA
		Nkx2-1_sg3	GACGGCAAACCCTGCCAGGC
		Nkx2-1_sg4	GCCATGCAGCAGCACGCCGT
		Nkx2-1_sg5	GCCGTGGGGGGCTACTGCAA
		Control_sg1	ACGGAGGCTAAGCGTCGCAA
		Control_sg2	CGCTTCCGCGGCCCGTTCAA
		Control_sg3	ATCGTTTCCGCTTAACGGCG
		Control_sg4	GTAGGCGCGCCGCTCTCTAC
		Control_sg5	CCATATCGGGGCGAGACATG
		Control_sg6	TACTAACGCCGCTCCTACAG
		Control_sg7	TGAGGATCATGTCGAGCGCC
		Control_sg8	GGGCCCGCATAGGATATCGC
