# Supplementary material for: Spatially Resolved Panoramic in vivo CRISPR Screen via Perturb-DBiT
Source: Research Square preprint supplement (doi:10.21203/rs.3.rs-6481967/v1), 2025-05-08
Supplement: Supplementary file 22 [file Table_S5.xlsx]

## Sheet: Sheet1
gene	sgRNA	sgRNA_sequence	Forward (5'-3')	Reverse (5'-3')
SEMA6B	sg28312	GGCATTGTACTGCATCCCGG	GGGAGTGGGCTCTAACAGTG	CTCACCCTCCATCTACCCCA
MT1E	sg11816	GGTGGCTCCTGCACGTGCGC	CAGCATCCCCTTTGCTCGAA	GGTGGCAGTAGACTTGACCG
ATG4A	sg57430	TGGGGATGTATGCTACGCTG	TCTTCTGATGCCTCATCTAGGGA	AAACCAAAATAGCGCCAGCTC
SLC22A16	sg54894	GGGCCTGCAGACATGATGAG	TACTTGGGCCCCTTTCATATGC	CTGGGGTCCACAGTTAATAAGTGG
ADAM20	sg22879	GGTGTGTGTGCGAGCTACAG	GGTCCCTGAGTCCTTGGTTG	TACCACAGTGACCGAAACGG
S100A4	sg16727	GAGCAACTTGGACAGCAACA	CCTGCAGACGTTCCCTTCAA	GGACTGTCAACGTCAGCACT
KCTD16	sg45731	AGAGTGTGGATTCCACATGG	AGCATCCCTCATTCCCTCCT	GCAAGTCTTCAGCAACCAGC
ASAH2	sg44305	GGGACCATTGAAAACCACAA	TGCGTGCATCAGTCATCCTT	CCTCACTCCACCTCATCTGC
FGL2	sg29393	GGGAGCTGAATAGTCAAGGG	ACTGCGTTTGATGAGGGCTAT	AGTGACTTCCAGTGGATACAGA
ADARB1	sg271	TTCAGAAATCAGAGCGAGGG	TACATGAGTGATCGTGGCCT	ATGGAGGATCACATACACCTCTGA
ARHGAP6	sg1139	GAGGTTCCCCTGGGTCGCGG	CTCTTCCTGACCCTCTTCGC	GGACATCCCATTTCCAGGCA
CREBZF	sg46558	GGCGGAGGCTCGGATAGCGG	CTGCATTTCGTTTCGGCCAG	GTTGAAAGGGGTAAACGCGG
DHRS7C	sg64818	TAGAAGACCTTACCTTGCTG	ACCCTGGCTGAGGTGTCTAT	TTGAGCCAGCAAATGCAACC
NR4A3	sg21174	CGGGTGGCTCTCAAGCGCGG	CCGACTACACCAAGCTGACC	TGGTACGCACACACTATCCC
