# Supplementary material for: Spatially Resolved Panoramic in vivo CRISPR Screen via Perturb-DBiT
Source: Research Square preprint supplement (doi:10.21203/rs.3.rs-6481967/v1), 2025-05-08
Supplement: Supplementary file 27 [file Table_S6.xlsx]

## Sheet: Sheet1
Sequence type	Cutadapt parameters
Spatial barcode A	-e 0.1 -m 8 -M 10 -l 8 --discard-untrimmed
Spatial barcode B	-e 0.1 -m 8 -M 10 -l 8 --discard-untrimmed
UMI	-e 0.1 -m 10 -M 12 -l 10 --discard-untrimmed
sgRNA spacer	-e 0.1 -m 15 -M 30 --discard-untrimmed
Chemistry and sequence	Cutadapt parameters
PolyA enrichment
Spatial barcode A	-g ATCCACGTGCTTGAGAGGCCAGAGCATTCG
Spatial barcode B	-g CAAGCGTTGGCTTCTCGCATCT
UMI	-g GGCCGATGTTTCGCATCGGCGTACGACT
sgRNA spacer	-gGGTATCAACGCAGAGTGAATGGGG;\ min_overlap=6...GTTTTAGAGCTAGAAATAGC;min_overlap=6
Capture (size selection) v1
Spatial barcode A	-g CCCATGATCGTCCGACGCGCTGCATACTTG
Spatial barcode B	-a CCCATGATCGTCCGACGCGCTGCATACTTG
UMI	-g GTGGCCGATGTTTCGCCCATGATCGTCCGA
sgRNA spacer	-gGGTATCAACGCAGAGTGAATGGG;\ min_overlap=6...GTTTTAGAGCTAGAAATAGC;min_overlap=6
Capture (size selection) v2
Spatial barcode A	-g CCCATGATCGTCCGACGCGCTGCATACTTG
Spatial barcode B	-g GTCAGATGTGTATAAGAGACAG
UMI	-g GATATCGGTCTCGTGGGCTCGG
sgRNA spacer	-g GGTATCAACGCAGAGTGAATGGG;\
	min_overlap=6...GTTTTAGAGCTAGAAATAGC;min_overlap=6
100x100 pixel
Spatial barcode A	-g ATCCACGTGCTTGAGAGGCCAGAGCATTCG
Spatial barcode B	-O 13 -g CAAGCGTTGGCTTCTCGCATCTN(10)
UMI	-g CAAGCGTTGGCTTCTCGCATCT
sgRNA spacer	-g GGTATCAACGCAGAGTGAATGGG;\
	min_overlap=6...GTTTTAGAGCTAGAAATAGC;min_overlap=6
Sequence type	Bowtie parameters
Spatial barcode A	-v 1 -m 2 --suppress 2,4,5,6,7,8 --chunkmbs 2000 --best
Spatial barcode B	-v 1 -m 2 --suppress 2,4,5,6,7,8 --chunkmbs 2000 --best
UMI	-v 0 -m 4 --suppress 2,4,5,6,7,8 --chunkmbs 2000 --best
sgRNA spacer	-v 2 -m 2 --suppress 2,4,5,6,7,8 --chunkmbs 2000 --best
